# Supplementary material for: SERS detection of radiation injury biomarkers in mouse serum
Source: Royal Society of Chemistry journal article supplement (doi:10.1039/c7ra12238a), 2018-01-01
Supplement: c7ra12238a1.pdf [file c7ra12238a1.pdf]

## SERS detection of radiation injuring biomarker in mice serum

Liansheng Li <sup>1,3</sup>, Rui Xiao <sup>2</sup>, Qi Wang <sup>1</sup>, Zhen Rong <sup>2</sup>, Hanjiang Fu <sup>1,3</sup>, Xueqing Zhang<sup>1</sup>, Pingkun Zhou <sup>1,3</sup>, Shengqi Wang<sup>2,3</sup> & Zhidong Wang <sup>1,3</sup>

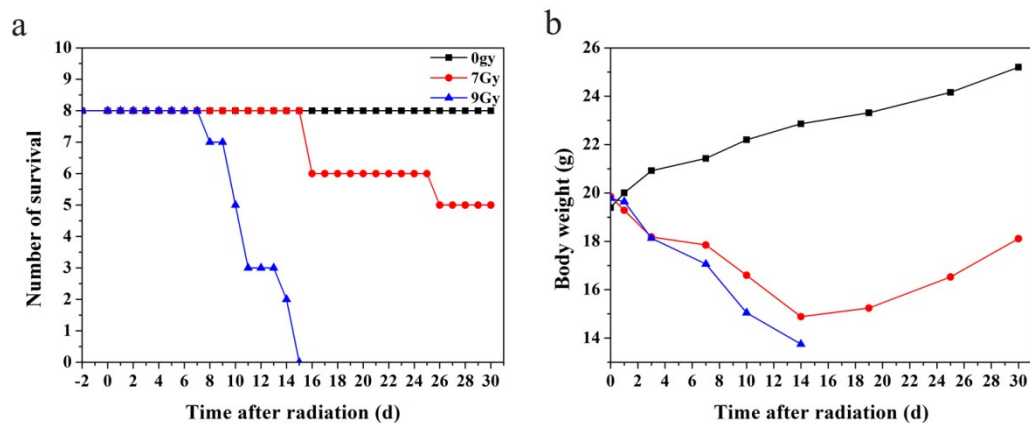

S.1 Model of laboratory animal, C57BL/6J, including normal control (square) and TBI with two different doses. (a) Comparison of the number of survivors from 0 day to 30 days; (b) Comparison of body weight from 0 day to 30 days;
